# Supplementary material for: Efficacy of assisted partner services for people who inject drugs in Kenya to identify partners living with HIV and hepatitis C virus infection: a prospective cohort study
Source: PubMed Central journal article supplement — Lancet Glob Health. Author manuscript; Available in PMC 2024 May 16. (PMC11097040; doi:10.1016/s2214-109x(24)00051-2), 2024-05
Supplement: NIHMS1985654-supplement-1.pdf [file NIHMS1985654-supplement-1.pdf]

# THE LANCET

## Global Health

### Supplementary appendix 1

This appendix formed part of the original submission and has been peer reviewed. We post it as supplied by the authors.

Supplement to: Monroe-Wise A, Mbogo L, Sambai B, et al. Efficacy of assisted partner services for people who inject drugs in Kenya to identify partners living with HIV and hepatitis C virus infection: a prospective cohort study. *Lancet Glob Health* 2024; **12**: e859–67.

Supplemental Table 1. The types of violence reported by participants and the primary perpetrators of this violence

| Perpetrator                | Type of Violence |             |              |              |
|----------------------------|------------------|-------------|--------------|--------------|
|                            | physical         | forced sex  | threatened   | any          |
| <b>Drug dealer</b>         | 70 (5.4%)        | 2 (0.8%)    | 59 (6.63%)   | 131 (5.39%)  |
| <b>Gang member(s)</b>      | 303 (23.4%)      | 10 (4.1%)   | 219 (24.61%) | 532 (21.88%) |
| <b>Mob</b>                 | 197 (15.2%)      | 1 (0.4%)    | 140 (15.73%) | 338 (13.9%)  |
| <b>Police officer</b>      | 188 (14.5%)      | 1 (0.4%)    | 144 (16.18%) | 333 (13.7%)  |
| <b>Spouse</b>              | 74 (5.7%)        | 43 (17.5%)  | 44 (4.94%)   | 161 (6.62%)  |
| <b>Other sex partner</b>   | 203 (15.7%)      | 170 (69.1%) | 144 (16.18%) | 517 (21.27%) |
| <b>Family (non-spouse)</b> | 52 (4%)          | 3 (1.2%)    | 39 (4.38%)   | 94 (3.87%)   |
| <b>Other</b>               | 208 (16.1%)      | 16 (6.5%)   | 101 (11.35%) | 325 (13.37%) |
| <b>Total*</b>              | 1295             | 246         | 890          | 2431         |

\*Totals are based on the number of reported perpetrators of violence (not the number of partners). Some partners did not identify a perpetrator of the violence they experienced, while others reported multiple types of perpetrators and/or experiencing multiple types of violence.

Supplemental Table 2. Index numbers needed to interview to find partners with HCV in different categories

|                                                                                                         | <b>Index Number Needed To Interview (NNTI) (95% CI) [ICC]*</b> |
|---------------------------------------------------------------------------------------------------------|----------------------------------------------------------------|
| <b>All Partners</b>                                                                                     |                                                                |
| Any partner seropositive for HCV antibodies                                                             | 2.52 (2.28-2.80) [0.07]                                        |
| A partner seropositive for HCV<br>(who did not know their HCV antibody status and had not been treated) | 3.47 (3.11-3.91) [0.07]                                        |
| A partner with an active HCV infection (viremic)                                                        | 4.69 (4.07-5.46) [0.03]                                        |
| <b>Injecting Partners</b>                                                                               |                                                                |
| Any partner seropositive for HCV antibodies                                                             | 3.29 (2.93-3.76) [0.09]                                        |
| A partner seropositive for HCV<br>(who did not know their HCV antibody status and had not been treated) | 4.45 (3.89-5.18) [0.07]                                        |
| A partner with an active HCV infection (viremic)                                                        | 6.34 (5.32-7.55) [0.04]                                        |
| <b>Sexual Partners</b>                                                                                  |                                                                |
| Any partner seropositive for HCV antibodies                                                             | 25.36 (19.39-35.32) [<0.005]                                   |
| A partner seropositive for HCV<br>(who did not know their HCV antibody status and had not been treated) | 34.1 (24.73-52.05) [0.01]                                      |
| A partner with an active HCV infection (viremic)                                                        | 41.21 (28.26-65.93) [0.02]                                     |

\*95% CI is calculated from a non-parametric bootstrap, ICC is calculated across 10 study sites
